# Supplementary material
Source: Research Square preprint supplement (doi:10.21203/rs.3.rs-9509678/v1)
Supplement: Supplementary file 1 [file 1f50d84d08b2dd73d895da44.xlsx]

## Sheet: Table S1
iid	Predicted_Degree	Prob_Degree	Predicted_Type	Type_1st	Prob_1st	Type_2nd	Prob_2nd	Type_3rd	Prob_3rd	Count	Total	Max	Mean	Var	cm20	meandate	region	date_label_2	sumroh	froh
I14844	First Degree	0.9966	fs	fs	0.9593	po	0.0373	av	0.0011	34	712.206	48.304	20.9472	129.593	>20 cM	-	Anatolia	200 CE-600 CE	712.206	0.237402
R6750	First Degree	0.9378	fs	fs	0.8812	po	0.0566	dfc	0.0552	29	557.573	51.4148	19.2266	162.153	>20 cM	1802.25	Balkan	1 CE-200 CE	557.573	0.185858
NEV020.AG	Second Degree	0.6436	Unassigned (Low Prob)	po	0.2977	gp	0.2472	av	0.1899	22	494.41	64.3941	22.4732	369.262	>20 cM	1791	Anatolia	1 CE-200 CE	494.41	0.164803
I14635	Second Degree	0.9347	Unassigned (Low Prob)	av	0.2627	hs	0.2607	dfc	0.1685	17	336.119	62.0969	19.7717	385.883	>20 cM	2500	Anatolia	600 BCE-1 CE	336.119	0.11204
I20224	Second Degree	0.9764	Unassigned (Low Prob)	qhfc	0.3981	av	0.2738	dfc	0.2357	18	305.163	77.4536	16.9535	277.226	>20 cM	2565	Anatolia	1200 BCE-600 BCE	305.163	0.101721
R1015	Second Degree	0.9849	Unassigned (Low Prob)	qhfc	0.4262	dfc	0.3943	av	0.1446	20	290.434	45.7089	14.5217	82.8568	>20 cM	2800	S Europe	1200 BCE-600 BCE	290.434	0.0968114
R11111	Second Degree	0.7047	Unassigned (Low Prob)	qhfc	0.2428	dfc	0.1945	fc	0.1835	14	213.313	43.6185	15.2366	143.304	>20 cM	1749.5	S Europe	200 CE-600 CE	213.313	0.0711043
R473	Third Degree	0.6919	Unassigned (Low Prob)	fc	0.3006	ggp	0.219	hav	0.1723	11	187.27	58.6623	17.0245	215.972	>20 cM	2600	S Europe	1200 BCE-600 BCE	187.27	0.0624232
I14845	Third Degree	0.8766	fc	fc	0.6814	hav	0.1031	ggp	0.092	11	172.26	30.3112	15.66	66.9691	>20 cM	1900	Anatolia	1 CE-200 CE	172.26	0.0574201
R6756	Third Degree	0.8891	fc	fc	0.6307	hav	0.2266	av	0.0439	10	157.987	32.6597	15.7987	84.2487	>20 cM	1770	Balkan	1 CE-200 CE	157.987	0.0526624
I8372	Third Degree	0.7489	fc	fc	0.6481	qhfc	0.0907	gp	0.0694	12	148.502	24.9157	12.3752	42.8342	>20 cM	1565	Anatolia	200 CE-600 CE	148.502	0.0495007
R121	Third Degree	0.9431	Unassigned (Low Prob)	fc	0.3797	hav	0.3436	ggp	0.2198	9	108.166	30.5166	12.0184	122.244	>20 cM	1450	S Europe	200 CE-600 CE	108.166	0.0360553
NEV030.AG	Third Degree	0.9998	Unassigned (Low Prob)	ggp	0.4128	hav	0.3785	fc	0.2085	6	101.087	43.2975	16.8478	215.664	>20 cM	2583	Anatolia	1200 BCE-600 BCE	101.087	0.0336956
R474	Third Degree	0.9931	Unassigned (Low Prob)	ggp	0.4486	hav	0.4338	fc	0.1108	4	100.153	39.5144	25.0383	123.005	>20 cM	2600	S Europe	1200 BCE-600 BCE	100.153	0.0333844
R11833	Third Degree	0.9954	Unassigned (Low Prob)	hav	0.4601	ggp	0.3126	fc	0.2227	4	87.2846	37.5139	21.8211	155.188	>20 cM	1636.75	S Europe	200 CE-600 CE	87.2846	0.0290949
VIL006	Third Degree	0.983	Unassigned (Low Prob)	hav	0.4224	fc	0.3097	ggp	0.2509	6	72.5843	41.294	12.0974	213.682	>20 cM	2623	S Europe	1200 BCE-600 BCE	72.5843	0.0241948
R2040	Third Degree	0.9981	Unassigned (Low Prob)	ggp	0.4877	fc	0.4043	hav	0.1061	6	70.0947	20.7698	11.6825	44.0743	>20 cM	1626.5	Balkan	200 CE-600 CE	70.0947	0.0233649
I4532	Third Degree	0.9996	fc	fc	0.5482	hav	0.2272	ggp	0.2242	6	67.0115	19.2453	11.1686	43.0224	<20 cM	1222	Anatolia	600 CE-1000 CE	67.0115	0.0223372
I10392	Unrelated / Distant	0	Unrelated / Distant	NA	0	NA	0	NA	0	2	41.7828	22.04	20.8914	2.63857	>20 cM	2250	Balkan	600 BCE-1 CE	41.7828	0.0139276
I20258	Unrelated / Distant	0	Unrelated / Distant	NA	0	NA	0	NA	0	3	39.4596	14.7073	13.1532	4.6025	<20 cM	2565	Anatolia	1200 BCE-600 BCE	39.4596	0.0131532
I10390	Unrelated / Distant	0	Unrelated / Distant	NA	0	NA	0	NA	0	5	37.5319	9.2718	7.50638	1.88176	<20 cM	2343	Balkan	600 BCE-1 CE	37.5319	0.0125106
I15518	Unrelated / Distant	0	Unrelated / Distant	NA	0	NA	0	NA	0	4	35.0799	13.038	8.76997	10.9206	<20 cM	1688	Balkan	200 CE-600 CE	35.0799	0.0116933
R3478	Unrelated / Distant	0	Unrelated / Distant	NA	0	NA	0	NA	0	3	31.7045	12.1837	10.5682	2.94469	<20 cM	1155	Balkan	600 CE-1000 CE	31.7045	0.0105682
I20232	Unrelated / Distant	0	Unrelated / Distant	NA	0	NA	0	NA	0	2	31.6538	19.8864	15.8269	32.959	<20 cM	2565	Anatolia	1200 BCE-600 BCE	31.6538	0.0105513
I20260	Unrelated / Distant	0	Unrelated / Distant	NA	0	NA	0	NA	0	2	30.16	20.36	15.08	55.7569	>20 cM	1346	Anatolia	600 CE-1000 CE	30.16	0.0100533
VOL001	Unrelated / Distant	0	Unrelated / Distant	NA	0	NA	0	NA	0	1	30.0427	30.0427	30.0427	0	>20 cM	2072	S Europe	600 BCE-1 CE	30.0427	0.0100142
R110	Unrelated / Distant	0	Unrelated / Distant	NA	0	NA	0	NA	0	3	29.794	18.7897	9.93133	60.9164	<20 cM	1450	S Europe	200 CE-600 CE	29.794	0.00993133
I14692	Unrelated / Distant	0	Unrelated / Distant	NA	0	NA	0	NA	0	5	27.8829	9.8199	5.57658	5.93364	<20 cM	2900	Balkan	1200 BCE-600 BCE	27.8829	0.00929431
I5723	Unrelated / Distant	0	Unrelated / Distant	NA	0	NA	0	NA	0	2	26.3107	20.7335	13.1553	114.857	>20 cM	2374	Balkan	600 BCE-1 CE	26.3107	0.00877023
I6573	Unrelated / Distant	0	Unrelated / Distant	NA	0	NA	0	NA	0	2	23.8307	17.8434	11.9154	70.2834	<20 cM	2127	Anatolia	600 BCE-1 CE	23.8307	0.00794357
PRZ001	Unrelated / Distant	0	Unrelated / Distant	NA	0	NA	0	NA	0	2	21.7058	16.2048	10.8529	57.2856	<20 cM	2610	S Europe	1200 BCE-600 BCE	21.7058	0.00723527
I26745	Unrelated / Distant	0	Unrelated / Distant	NA	0	NA	0	NA	0	1	18.8868	18.8868	18.8868	0	<20 cM	1226	Balkan	600 CE-1000 CE	18.8868	0.0062956
ORC009	Unrelated / Distant	0	Unrelated / Distant	NA	0	NA	0	NA	0	2	18.6796	13.0977	9.3398	28.2436	<20 cM	3066	S Europe	1200 BCE-600 BCE	18.6796	0.00622653
I8369	Unrelated / Distant	0	Unrelated / Distant	NA	0	NA	0	NA	0	2	18.613	10.5283	9.3065	2.98556	<20 cM	1350	Anatolia	200 CE-600 CE	18.613	0.00620433
R11118	Unrelated / Distant	0	Unrelated / Distant	NA	0	NA	0	NA	0	4	17.7954	4.881	4.44885	0.237251	<20 cM	1749.5	S Europe	200 CE-600 CE	17.7954	0.0059318
I5726	Unrelated / Distant	0	Unrelated / Distant	NA	0	NA	0	NA	0	1	17.4095	17.4095	17.4095	0	<20 cM	2407	Balkan	600 BCE-1 CE	17.4095	0.00580317
I18830	Unrelated / Distant	0	Unrelated / Distant	NA	0	NA	0	NA	0	1	15.0028	15.0028	15.0028	0	<20 cM	2201	Balkan	600 BCE-1 CE	15.0028	0.00500093
I20184	Unrelated / Distant	0	Unrelated / Distant	NA	0	NA	0	NA	0	3	14.6102	6.0587	4.87007	1.08791	<20 cM	2750	Balkan	1200 BCE-600 BCE	14.6102	0.00487006
I16253	Unrelated / Distant	0	Unrelated / Distant	NA	0	NA	0	NA	0	2	14.4131	8.8851	7.20655	5.63503	<20 cM	2426	Balkan	600 BCE-1 CE	14.4131	0.00480437
I15541	Unrelated / Distant	0	Unrelated / Distant	NA	0	NA	0	NA	0	1	14.1685	14.1685	14.1685	0	<20 cM	1050	Balkan	600 CE-1000 CE	14.1685	0.00472283
R851	Unrelated / Distant	0	Unrelated / Distant	NA	0	NA	0	NA	0	2	12.9279	8.8783	6.46395	11.6582	<20 cM	2600	S Europe	1200 BCE-600 BCE	12.9279	0.0043093
SUA006	Unrelated / Distant	0	Unrelated / Distant	NA	0	NA	0	NA	0	2	12.5807	7.75	6.29035	4.26114	<20 cM	3137.5	S Europe	1200 BCE-600 BCE	12.5807	0.00419357
R3663	Unrelated / Distant	0	Unrelated / Distant	NA	0	NA	0	NA	0	2	12.5451	7.6532	6.27255	3.8124	<20 cM	1168.75	Balkan	600 CE-1000 CE	12.5451	0.0041817
TAQ012	Unrelated / Distant	0	Unrelated / Distant	NA	0	NA	0	NA	0	1	11.4845	11.4845	11.4845	0	<20 cM	2151	S Europe	600 BCE-1 CE	11.4845	0.00382817
I20227	Unrelated / Distant	0	Unrelated / Distant	NA	0	NA	0	NA	0	1	10.9394	10.9394	10.9394	0	<20 cM	2565	Anatolia	1200 BCE-600 BCE	10.9394	0.00364647
VEN001	Unrelated / Distant	0	Unrelated / Distant	NA	0	NA	0	NA	0	1	10.3939	10.3939	10.3939	0	<20 cM	1225	S Europe	600 CE-1000 CE	10.3939	0.00346464
I20230	Unrelated / Distant	0	Unrelated / Distant	NA	0	NA	0	NA	0	2	10.3862	6.0011	5.19311	1.30571	<20 cM	2565	Anatolia	1200 BCE-600 BCE	10.3862	0.00346207
R6759	Unrelated / Distant	0	Unrelated / Distant	NA	0	NA	0	NA	0	2	10.217	5.21359	5.1085	0.0220899	<20 cM	1799.75	Balkan	1 CE-200 CE	10.217	0.00340567
I18831	Unrelated / Distant	0	Unrelated / Distant	NA	0	NA	0	NA	0	2	9.8387	5.4762	4.91935	0.620165	<20 cM	2201	Balkan	600 BCE-1 CE	9.8387	0.00327957
I14831	Unrelated / Distant	0	Unrelated / Distant	NA	0	NA	0	NA	0	1	9.7162	9.7162	9.7162	0	<20 cM	1150	Anatolia	600 CE-1000 CE	9.7162	0.00323873
R10363	Unrelated / Distant	0	Unrelated / Distant	NA	0	NA	0	NA	0	1	9.7062	9.7062	9.7062	0	<20 cM	2248	S Europe	600 BCE-1 CE	9.7062	0.0032354
R10338	Unrelated / Distant	0	Unrelated / Distant	NA	0	NA	0	NA	0	2	9.30531	5.0948	4.65265	0.390988	<20 cM	2328	S Europe	600 BCE-1 CE	9.30531	0.00310177
R104	Unrelated / Distant	0	Unrelated / Distant	NA	0	NA	0	NA	0	2	8.96349	4.8515	4.48175	0.273437	<20 cM	1319	S Europe	600 CE-1000 CE	8.96349	0.00298783
VET002	Unrelated / Distant	0	Unrelated / Distant	NA	0	NA	0	NA	0	2	8.94929	4.55689	4.47465	0.0135291	<20 cM	2614	S Europe	1200 BCE-600 BCE	8.94929	0.0029831
ORC005	Unrelated / Distant	0	Unrelated / Distant	NA	0	NA	0	NA	0	2	8.86659	4.64339	4.4333	0.0882819	<20 cM	3143	S Europe	1200 BCE-600 BCE	8.86659	0.00295553
ORC002	Unrelated / Distant	0	Unrelated / Distant	NA	0	NA	0	NA	0	1	8.8188	8.8188	8.8188	0	<20 cM	2252	S Europe	600 BCE-1 CE	8.8188	0.0029396
I32305	Unrelated / Distant	0	Unrelated / Distant	NA	0	NA	0	NA	0	2	8.5502	4.5414	4.2751	0.14183	<20 cM	1850	Balkan	1 CE-200 CE	8.5502	0.00285007
I26748	Unrelated / Distant	0	Unrelated / Distant	NA	0	NA	0	NA	0	1	7.9793	7.9793	7.9793	0	<20 cM	1112	Balkan	600 CE-1000 CE	7.9793	0.00265977
I20229	Unrelated / Distant	0	Unrelated / Distant	NA	0	NA	0	NA	0	1	7.735	7.735	7.735	0	<20 cM	2565	Anatolia	1200 BCE-600 BCE	7.735	0.00257833
R80	Unrelated / Distant	0	Unrelated / Distant	NA	0	NA	0	NA	0	1	7.4786	7.4786	7.4786	0	<20 cM	1840	S Europe	1 CE-200 CE	7.4786	0.00249287
I10546	Unrelated / Distant	0	Unrelated / Distant	NA	0	NA	0	NA	0	1	7.4725	7.4725	7.4725	0	<20 cM	1250	Anatolia	600 CE-1000 CE	7.4725	0.00249083
R1021	Unrelated / Distant	0	Unrelated / Distant	NA	0	NA	0	NA	0	1	6.95261	6.95261	6.95261	0	<20 cM	2600	S Europe	1200 BCE-600 BCE	6.95261	0.00231754
R11109	Unrelated / Distant	0	Unrelated / Distant	NA	0	NA	0	NA	0	1	6.5156	6.5156	6.5156	0	<20 cM	1749.5	S Europe	200 CE-600 CE	6.5156	0.00217187
R11832	Unrelated / Distant	0	Unrelated / Distant	NA	0	NA	0	NA	0	1	6.064	6.064	6.064	0	<20 cM	1656	S Europe	200 CE-600 CE	6.064	0.00202133
R11834	Unrelated / Distant	0	Unrelated / Distant	NA	0	NA	0	NA	0	1	6.0189	6.0189	6.0189	0	<20 cM	1768	S Europe	1 CE-200 CE	6.0189	0.0020063
I26751	Unrelated / Distant	0	Unrelated / Distant	NA	0	NA	0	NA	0	1	5.9601	5.9601	5.9601	0	<20 cM	1700	Balkan	200 CE-600 CE	5.9601	0.0019867
I20231	Unrelated / Distant	0	Unrelated / Distant	NA	0	NA	0	NA	0	1	5.9479	5.9479	5.9479	0	<20 cM	2565	Anatolia	1200 BCE-600 BCE	5.9479	0.00198263
I10383	Unrelated / Distant	0	Unrelated / Distant	NA	0	NA	0	NA	0	1	5.8335	5.8335	5.8335	0	<20 cM	2607	Balkan	1200 BCE-600 BCE	5.8335	0.0019445
I15551	Unrelated / Distant	0	Unrelated / Distant	NA	0	NA	0	NA	0	1	5.5985	5.5985	5.5985	0	<20 cM	1645	Balkan	200 CE-600 CE	5.5985	0.00186617
R11112	Unrelated / Distant	0	Unrelated / Distant	NA	0	NA	0	NA	0	1	5.43801	5.43801	5.43801	0	<20 cM	1749.5	S Europe	200 CE-600 CE	5.43801	0.00181267
TAQ011	Unrelated / Distant	0	Unrelated / Distant	NA	0	NA	0	NA	0	1	5.2228	5.2228	5.2228	0	<20 cM	991	S Europe	600 CE-1000 CE	5.2228	0.00174093
MAS003	Unrelated / Distant	0	Unrelated / Distant	NA	0	NA	0	NA	0	1	5.07371	5.07371	5.07371	0	<20 cM	1485	S Europe	200 CE-600 CE	5.07371	0.00169124
R10339	Unrelated / Distant	0	Unrelated / Distant	NA	0	NA	0	NA	0	1	5.0385	5.0385	5.0385	0	<20 cM	2054.5	S Europe	600 BCE-1 CE	5.0385	0.0016795
VIL007	Unrelated / Distant	0	Unrelated / Distant	NA	0	NA	0	NA	0	1	4.9678	4.9678	4.9678	0	<20 cM	2409.5	S Europe	600 BCE-1 CE	4.9678	0.00165593
I14790	Unrelated / Distant	0	Unrelated / Distant	NA	0	NA	0	NA	0	1	4.9623	4.9623	4.9623	0	<20 cM	950	Anatolia	600 CE-1000 CE	4.9623	0.0016541
I20183	Unrelated / Distant	0	Unrelated / Distant	NA	0	NA	0	NA	0	1	4.8372	4.8372	4.8372	0	<20 cM	2750	Balkan	1200 BCE-600 BCE	4.8372	0.0016124
I20186	Unrelated / Distant	0	Unrelated / Distant	NA	0	NA	0	NA	0	1	4.7487	4.7487	4.7487	0	<20 cM	2750	Balkan	1200 BCE-600 BCE	4.7487	0.0015829
I8112	Unrelated / Distant	0	Unrelated / Distant	NA	0	NA	0	NA	0	1	4.6597	4.6597	4.6597	0	<20 cM	2614	Balkan	1200 BCE-600 BCE	4.6597	0.00155323
I10384	Unrelated / Distant	0	Unrelated / Distant	NA	0	NA	0	NA	0	1	4.5994	4.5994	4.5994	0	<20 cM	2550	Balkan	1200 BCE-600 BCE	4.5994	0.00153313
I26762	Unrelated / Distant	0	Unrelated / Distant	NA	0	NA	0	NA	0	1	4.5478	4.5478	4.5478	0	<20 cM	1575	Balkan	200 CE-600 CE	4.5478	0.00151593
I14690	Unrelated / Distant	0	Unrelated / Distant	NA	0	NA	0	NA	0	1	4.4834	4.4834	4.4834	0	<20 cM	3000	Balkan	1200 BCE-600 BCE	4.4834	0.00149447
I26775	Unrelated / Distant	0	Unrelated / Distant	NA	0	NA	0	NA	0	1	4.47609	4.47609	4.47609	0	<20 cM	1750	Balkan	1 CE-200 CE	4.47609	0.00149203
R37	Unrelated / Distant	0	Unrelated / Distant	NA	0	NA	0	NA	0	1	4.4739	4.4739	4.4739	0	<20 cM	1750	S Europe	1 CE-200 CE	4.4739	0.0014913
R11115	Unrelated / Distant	0	Unrelated / Distant	NA	0	NA	0	NA	0	1	4.4577	4.4577	4.4577	0	<20 cM	1749.5	S Europe	200 CE-600 CE	4.4577	0.0014859
I4531	Unrelated / Distant	0	Unrelated / Distant	NA	0	NA	0	NA	0	1	4.4539	4.4539	4.4539	0	<20 cM	1665	Anatolia	200 CE-600 CE	4.4539	0.00148463
I15537	Unrelated / Distant	0	Unrelated / Distant	NA	0	NA	0	NA	0	1	4.452	4.452	4.452	0	<20 cM	1050	Balkan	600 CE-1000 CE	4.452	0.001484
I27297	Unrelated / Distant	0	Unrelated / Distant	NA	0	NA	0	NA	0	1	4.4215	4.4215	4.4215	0	<20 cM	1399	Balkan	200 CE-600 CE	4.4215	0.00147383
ETR007	Unrelated / Distant	0	Unrelated / Distant	NA	0	NA	0	NA	0	1	4.411	4.411	4.411	0	<20 cM	1088	S Europe	600 CE-1000 CE	4.411	0.00147033
I15744	Unrelated / Distant	0	Unrelated / Distant	NA	0	NA	0	NA	0	1	4.40811	4.40811	4.40811	0	<20 cM	1228	Balkan	600 CE-1000 CE	4.40811	0.00146937
I15526	Unrelated / Distant	0	Unrelated / Distant	NA	0	NA	0	NA	0	1	4.3492	4.3492	4.3492	0	<20 cM	1680	Balkan	200 CE-600 CE	4.3492	0.00144973
R35	Unrelated / Distant	0	Unrelated / Distant	NA	0	NA	0	NA	0	1	4.3052	4.3052	4.3052	0	<20 cM	1450	S Europe	200 CE-600 CE	4.3052	0.00143507
R3665	Unrelated / Distant	0	Unrelated / Distant	NA	0	NA	0	NA	0	1	4.2264	4.2264	4.2264	0	<20 cM	1779.5	Balkan	1 CE-200 CE	4.2264	0.0014088
R3660	Unrelated / Distant	0	Unrelated / Distant	NA	0	NA	0	NA	0	1	4.2001	4.2001	4.2001	0	<20 cM	1453.25	Balkan	200 CE-600 CE	4.2001	0.00140003
R850	Unrelated / Distant	0	Unrelated / Distant	NA	0	NA	0	NA	0	1	4.1958	4.1958	4.1958	0	<20 cM	2600	S Europe	1200 BCE-600 BCE	4.1958	0.0013986
I10430	Unrelated / Distant	0	Unrelated / Distant	NA	0	NA	0	NA	0	1	4.1538	4.1538	4.1538	0	<20 cM	1218	Anatolia	600 CE-1000 CE	4.1538	0.0013846
I16256	Unrelated / Distant	0	Unrelated / Distant	NA	0	NA	0	NA	0	1	4.1402	4.1402	4.1402	0	<20 cM	2500	Balkan	600 BCE-1 CE	4.1402	0.00138007
R75	Unrelated / Distant	0	Unrelated / Distant	NA	0	NA	0	NA	0	1	4.1183	4.1183	4.1183	0	<20 cM	1850	S Europe	1 CE-200 CE	4.1183	0.00137277
TAQ010	Unrelated / Distant	0	Unrelated / Distant	NA	0	NA	0	NA	0	1	4.077	4.077	4.077	0	<20 cM	2151	S Europe	600 BCE-1 CE	4.077	0.001359
I13839	Unrelated / Distant	0	Unrelated / Distant	NA	0	NA	0	NA	0	1	4.0525	4.0525	4.0525	0	<20 cM	1014	Balkan	600 CE-1000 CE	4.0525	0.00135083
I15529	Unrelated / Distant	0	Unrelated / Distant	NA	0	NA	0	NA	0	1	4.0103	4.0103	4.0103	0	<20 cM	1800	Balkan	1 CE-200 CE	4.0103	0.00133677
R11116	Unrelated / Distant	0	Unrelated / Distant	NA	0	NA	0	NA	0	1	4.006	4.006	4.006	0	<20 cM	1749.5	S Europe	200 CE-600 CE	4.006	0.00133533
R2051	Unrelated / Distant	0	Unrelated / Distant	NA	0	NA	0	NA	0	1	4.0028	4.0028	4.0028	0	<20 cM	1482	Balkan	200 CE-600 CE	4.0028	0.00133427
